# Supplementary material
Source: Research Square preprint supplement (doi:10.21203/rs.3.rs-8997953/v1)
Supplement: Supplementary file 1 [file 10b8629ca734f5092159b755.docx]

**SUPPLEMENTARY INFORMATION**

**Major roads drive higher raptor mortality: insights from long-term rehabilitation data**

**Table S1.** Variance inflation factors to test for multicollinearity between predicator variables for 586 raptor-vehicle collisions occurring in England and Wales between 2001–2019.

| Predictor | GVIF | df | GVIF^(1/(2*Df)) |
| --- | --- | --- | --- |
| road type | 1.018 | 1 | 1.009 |
| season | 1.139 | 3 | 1.022 |
| landscape type | 1.037 | 2 | 1.009 |
| species | 1.118 | 7 | 1.008 |
| age | 1.079 | 1 | 1.039 |

**Table S2.** Overview of 10 raptor species admitted to four wildlife rehabilitation centres in England and Wales due to collisions with road vehicles between 2001–2019. Centres ordered by total admission numbers.

| Species | Gower Bird Hospital | Secret World Wildlife Rescue | Cuan Wildlife Rescue | Wild Wings Birds of Prey |
| --- | --- | --- | --- | --- |
| Common Buzzard (*Buteo buteo*) | 113 (36.1) | 47 (33.3) | 61 (52.6) | 3 (18.8) |
| Common Kestrel (*Falco tinnunculus*) | 5 (1.6) | 18 (12.8) | 4 (3.4) | 2 (12.5) |
| Eurasian Hobby (*Falco subbuteo*) | 0 (0) | 1 (0.7) | 0 (0) | 0 (0) |
| Eurasian Sparrowhawk (*Accipier nisus*) | 14 (4.5) | 8 (5.7) | 3 (2.6) | 1 (6.3) |
| Little Owl (*Athene noctua*) | 2 (0.6) | 6 (4.3) | 1 (0.9) | 0 (0) |
| Peregrine Falcon (*Falco peregrinus*) | 3 (1) | 2 (1.4) | 1 (0.9) | 0 (0) |
| Red Kite (*Milvus milvus*) | 9 (2.9) | 0 (0) | 0 (0) | 0 (0) |
| Short-eared Owl (*Asio flammeus*) | 0 (0) | 1 (0.7) | 0 (0) | 0 (0) |
| Tawny Owl (*Strix aluco*) | 136 (43.5) | 41 (29.1) | 39 (33.6) | 7 (43.8) |
| Western Barn Owl (*Tyto alba*) | 31 (9.9) | 17 (12.1) | 7 (6) | 3 (18.8) |
| Total | 313 (100) | 141 (100) | 116 (100) | 16 (100) |

**Table S3**. Model outputs for three poison linear models exploring trends over time in the number of raptor-vehicle collision admissions to four wildlife rehabilitation centres in England and Wales between 2001–2019. SE = standard error.

| Term | Estimate | SE | *z* | *P* |
| --- | --- | --- | --- | --- |
| *All species combined* |  |  |  |  |
| (Intercept) | 1.876 | 0.311 | 6.027 | < 0.0001 |
| year | -0.015 | 0.010 | -1.590 | 0.112 |
| *Diurnal raptors only* |  |  |  |  |
| (Intercept) | 1.776 | 0.442 | 4.020 | < 0.0001 |
| year | 0.007 | 0.014 | 0.504 | 0.614 |
| *Owls only* |  |  |  |  |
| (Intercept) | 77.096 | 22.149 | 3.481 | < 0.001 |
| year | -0.037 | 0.011 | -3.386 | < 0.001 |

**Table S4**. Model outputs for the mortality model exploring the effects of road type, season, landscape type and age on mortality probability for raptors admitted to four wildlife rehabilitation centres in England and Wales between 2001–2019 after being hit by road vehicles. SE = standard error.

| term | Estimate | SE | *z* | *P* |
| --- | --- | --- | --- | --- |
| (Intercept) | 2.122 | 0.703 | 3.020 | 0.003 |
| road type(minor) | -0.986 | 0.201 | -4.905 | < 0.0001 |
| season(summer) | 0.227 | 0.263 | 0.861 | 0.389 |
| season(autumn) | -0.100 | 0.286 | -0.349 | 0.727 |
| season(winter) | 0.055 | 0.277 | 0.198 | 0.843 |
| landscape type(open) | -1.307 | 0.674 | -1.939 | 0.052 |
| landscape type(urban) | -1.201 | 0.670 | -1.794 | 0.073 |
| age(juvenile) | -0.192 | 0.218 | -0.882 | 0.378 |
